# Supplementary material for: Heroin Self-Administration and Extinction Increase Prelimbic Cortical Astrocyte–Synapse Proximity and Alter Dendritic Spine Morphometrics That Are Reversed by N-Acetylcysteine
Source: MDPI journal article supplement (doi:10.3390/cells12141812), 2023-07-08
Supplement: s1 [file s1]

| Virus                              | Description/Use                                                                                                                                       | Source                                   |
|------------------------------------|-------------------------------------------------------------------------------------------------------------------------------------------------------|------------------------------------------|
| AAV5. <i>GfaABC1D</i> ::tdTomato   | <i>GfaABC1D</i> promoter driven expression of tdTomato.                                                                                               | Addgene #44332-AAV5                      |
| AAV5. <i>GfaABC1D</i> ::LcK-EGFP   | <i>GfaABC1D</i> promoter driven insertion of EGFP into astrocyte plasmalemma to label astrocytes                                                      | Addgene #105598-AAV5                     |
| AAV1.CAG.Flex::Ruby2sm-FLAG        | Cre-recombinase dependent CAG promoter driven delivery of FLAG tagged non-fluorescent variant of mRuby2 to label neurons for dendritic spine analysis | Addgene #98928-AAV1                      |
| rgAAV. <i>hSyn</i> ::Cre-WPRE.hGH  | Human synapsin promoter driven retrograde delivery of cre-recombinase to neurons                                                                      | Addgene #105553-AAVrg                    |
| AAV5. <i>GfaABC1D</i> ::shTSP2-GFP | <i>GfaABC1D</i> promoter driven expression of GFP, with a custom microRNA targeting TSP2 present in the 3' UTR of GFP.                                | Gift from the laboratory of Dr. Yan Dong |

Table S1: Names, descriptions and sourcing information for all AAV constructs used in these studies.
